# Supplementary material for: Empagliflozin reduces cardiovascular events, mortality and renal events in participants with type 2 diabetes after coronary artery bypass graft surgery: subanalysis of the EMPA-REG OUTCOME® randomised trial
Source: PubMed Central journal article supplement (PMC6061159; doi:10.1007/s00125-018-4644-9), 2018-05-19
Supplement: 125_2018_4644_MOESM1_ESM.pdf [file 125_2018_4644_MOESM1_ESM.pdf]

**Empagliflozin reduces cardiovascular events, mortality and renal events in participants with type 2 diabetes after coronary artery bypass graft surgery: subanalysis of the EMPA-REG OUTCOME<sup>®</sup> randomised trial (Verma S et al).**

**Electronic Supplementary Material (ESM)**

**ESM Fig. 1. Study disposition.**<sup>1</sup> From N Engl J Med, Zinman B, Wanner C, Lachin JM, Fitchett D, Bluhmki E, Hantel S, Mattheus M, Devins T, Johansen OE, Woerle HJ, Broedl UC, Inzucchi SE, Empagliflozin, Cardiovascular Outcomes, and Mortality in Type 2 Diabetes, Volume No. 373, Page No. 2117–28. Copyright © (2018) Massachusetts Medical Society. Reprinted with permission from Massachusetts Medical Society.

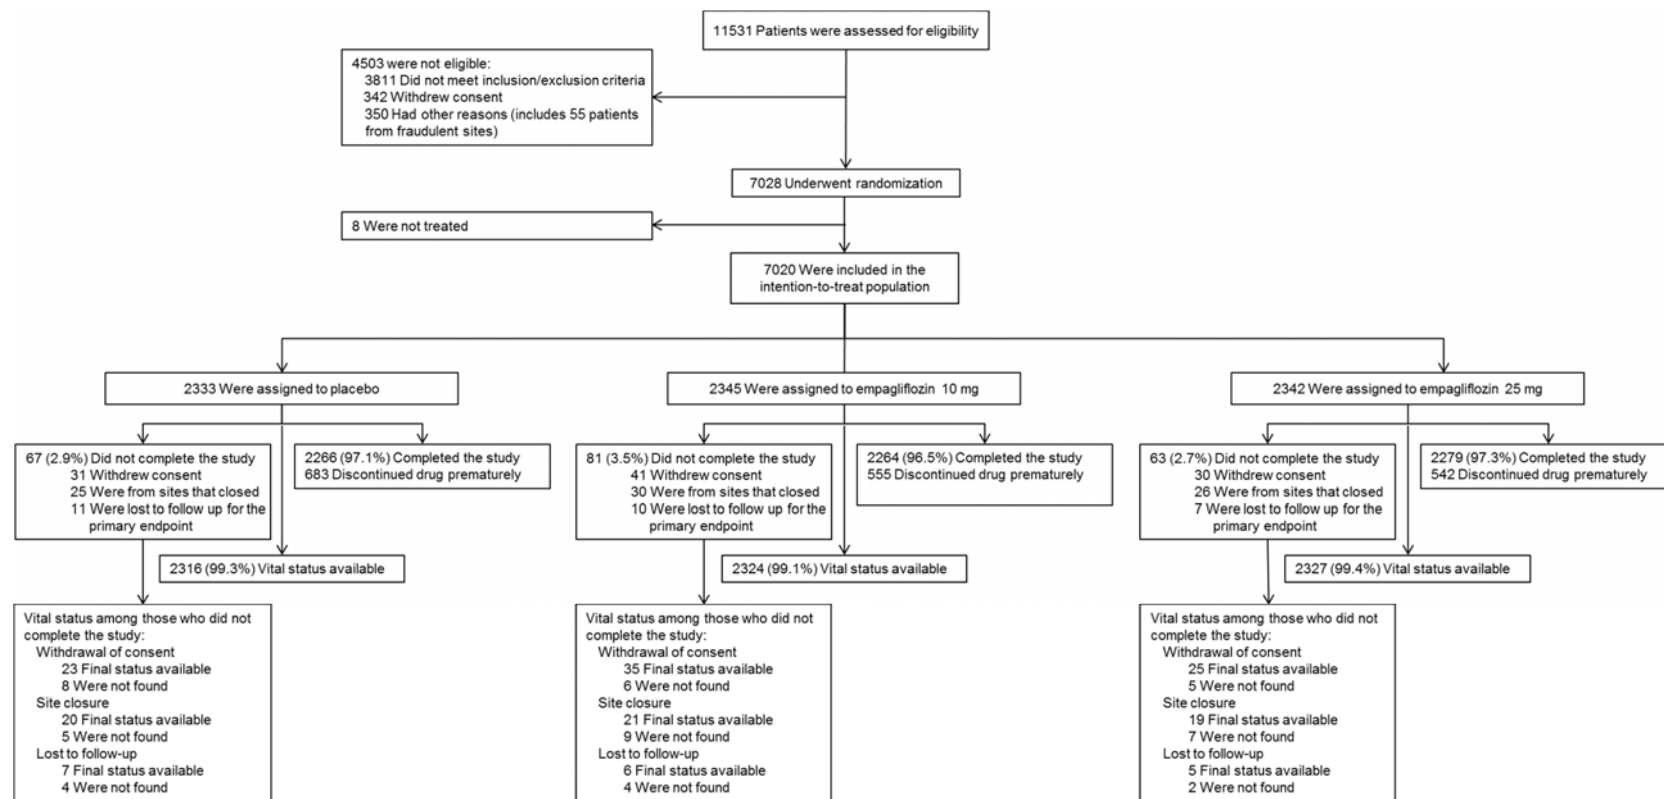

**ESM Table 1. Outcomes by time from coronary artery bypass graft (CABG) to randomisation**

| Outcome                           | Time from CABG to randomisation | Placebo            | Empagliflozin      |
|-----------------------------------|---------------------------------|--------------------|--------------------|
|                                   |                                 | n with event/N (%) | n with event/N (%) |
| CV death                          | ≤5 years                        | 9/207 (4.3)        | 13/472 (2.8)       |
|                                   | >5 to ≤10 years                 | 10/170 (5.9)       | 10/373 (2.7)       |
|                                   | >10 years                       | 13/181 (7.2)       | 12/322 (3.7)       |
| Hospitalisation for heart failure | ≤5 years                        | 9/207 (4.3)        | 11/472 (2.3)       |
|                                   | >5 to ≤10 years                 | 11/170 (6.5)       | 9/373 (2.4)        |
|                                   | >10 years                       | 18/181 (9.9)       | 18/322 (5.6)       |
| All-cause mortality               | ≤5 years                        | 11/207 (5.3)       | 21/472 (4.4)       |
|                                   | >5 to ≤10 years                 | 22/170 (12.9)      | 19/373 (5.1)       |
|                                   | >10 years                       | 17/181 (9.4)       | 19/322 (5.9)       |

Participants treated with ≥1 dose of study drug.

**ESM Table 2. Coronary revascularisation procedures in participants with history of coronary artery bypass graft at baseline**

| <b>Coronary revascularisation procedures during the trial</b> | <b>Placebo (N=563)</b> | <b>Empagliflozin (N=1175)</b> |
|---------------------------------------------------------------|------------------------|-------------------------------|
| Participants with $\geq 1$ procedure                          | 55 (9.8)               | 91 (7.7)                      |
| 1 procedure                                                   | 48 (8.5)               | 84 (7.1)                      |
| 2 procedures                                                  | 7 (1.2)                | 2 (0.2)                       |
| 3 procedures                                                  | 0                      | 4 (0.3)                       |
| 4 procedures                                                  | 0                      | 0                             |
| 5 procedures                                                  | 0                      | 1 (0.1)                       |

Data are *n* (%) in participants treated with  $\geq 1$  dose of study drug.

## References in ESM

1. Zinman B, Wanner C, Lachin JM et al. Empagliflozin, cardiovascular outcomes, and mortality in type 2 diabetes. *N Engl J Med* 2015;373:2117–2128.
